# Supplementary material for: A low-cost piezoresistive pressure sensor with a wide strain range – featuring polyurethane sponge@poly(vinyl alcohol)/sulfuric gel electrolyte
Source: Royal Society of Chemistry journal article supplement (doi:10.1039/d0tc01584a), 2020-12-23
Supplement: d0tc01584a4.pdf [file d0tc01584a4.pdf]

## Supporting Information

Low-cost piezoresistive pressure sensor with wide strain range-featuring polyurethane  
sponge @poly (vinyl alcohol)/sulfuric gel electrolyte

Haonan Cheng, BoWang, Kun Yang and Chaoxia Wang\*

College of Textile Science and Engineering, Key Laboratory of Eco-Textile, Ministry  
of Education Jiangnan University, Wuxi, 214122, People's Republic of China.

Email: wangchaoxia@sohu.com

### Supporting videos:

**Movie S1.** The video showing the compressing, bending and torsional properties of  
PAV/H<sub>2</sub>SO<sub>4</sub>@PU composite.

**Movie S2.** The video showing the planar extension phenomenon of PU sponge and  
PVA/H<sub>2</sub>SO<sub>4</sub>@PU prepared by dipping 30.0 wt % gel electrolyte

**Movie S3.** The video showing the resistance response of a PVA/H<sub>2</sub>SO<sub>4</sub>@PU pressure  
sensor attached to the index finger to finger bending.

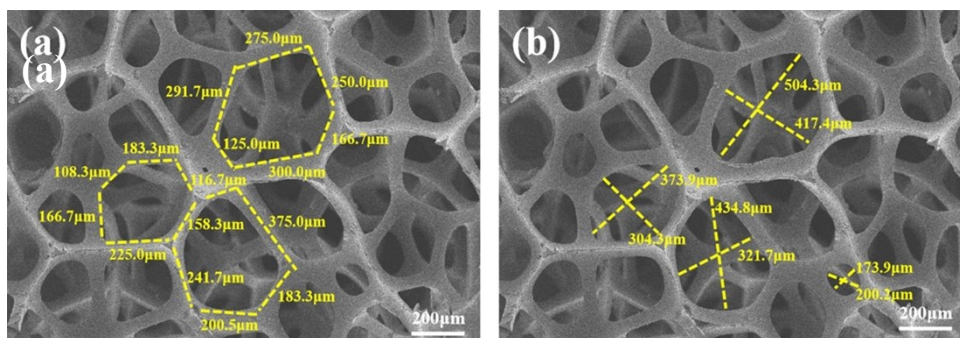

**Fig. S1** Skeleton length (a) and pore size (b) of the PU sponge.

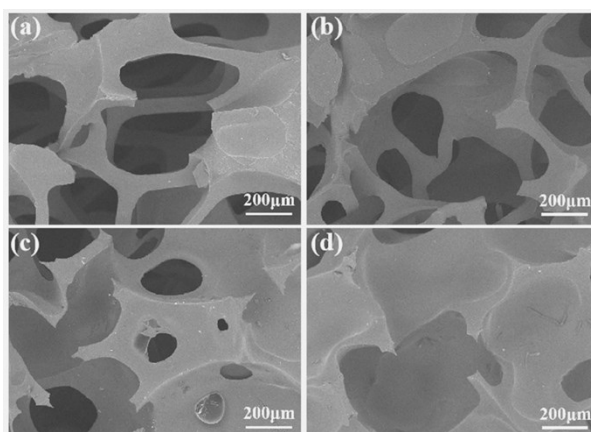

**Fig. S2** SEM images of PU/PVA/H<sub>2</sub>SO<sub>4</sub> composite prepared from the PAV/H<sub>2</sub>SO<sub>4</sub> gel electrolyte of different concentrations (a) 40.0 wt.%, (b) 60.0wt.%, (c) 80.0 wt.%, and (d)100.0 wt. %.

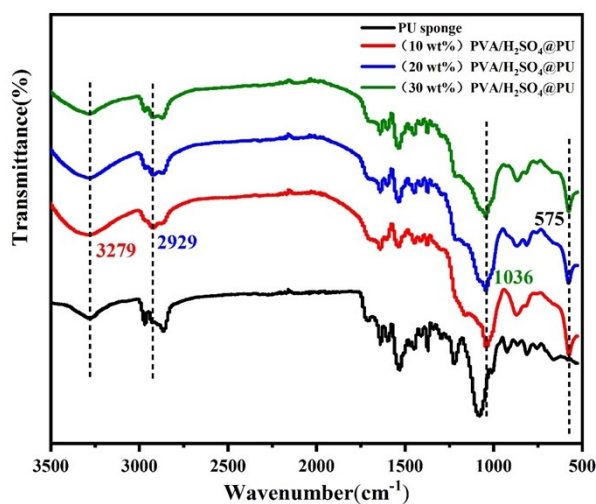

**Fig. S3** FTIR spectra of the PU sponge and PVA/H<sub>2</sub>SO<sub>4</sub>@PU composite prepared with the PVA/H<sub>2</sub>SO<sub>4</sub> gel electrolytes of different concentrations.

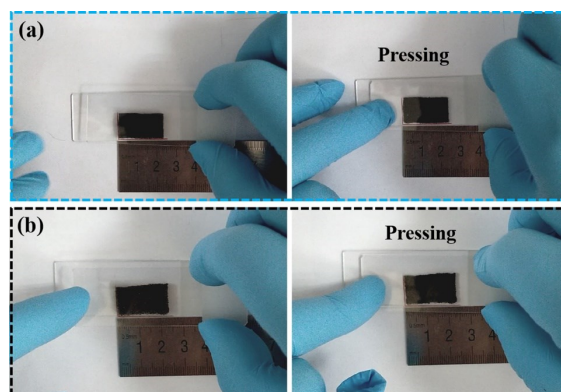

**Fig. S4** Planar extension phenomenon of PU sponge (a) and PVA/H<sub>2</sub>SO<sub>4</sub>@PU (b)

prepared by dipping 30.0 wt % PVA/ H<sub>2</sub>SO<sub>4</sub> gel electrolyte

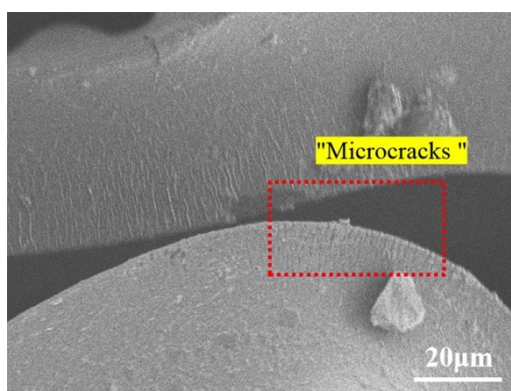

**Fig. S5** SEM of PVA/H<sub>2</sub>SO<sub>4</sub>@PU composites prepared by dipping 30.0 wt % PVA/ H<sub>2</sub>SO<sub>4</sub> gel electrolyte

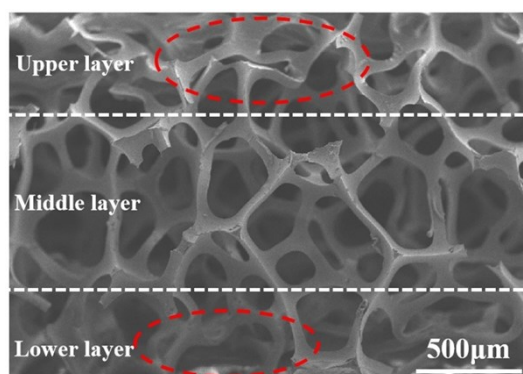

**Fig. S6** SEM of PVA/H<sub>2</sub>SO<sub>4</sub>@PU composites prepared by dipping 10.0wt % PVA/ H<sub>2</sub>SO<sub>4</sub> gel electrolyte during compression.

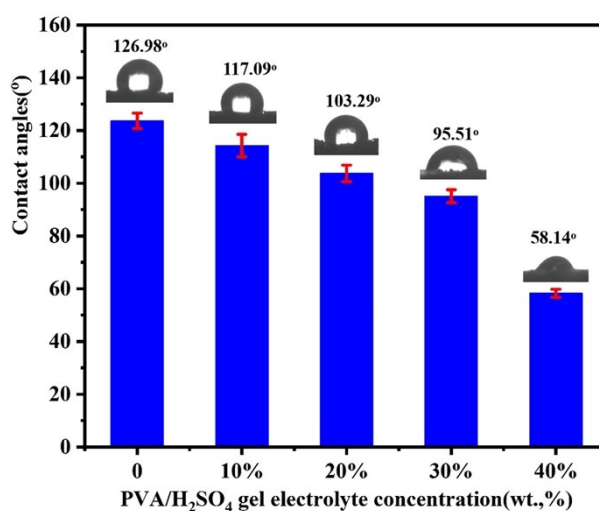

**Fig. S7** Hydrophilic test PVA/H<sub>2</sub>SO<sub>4</sub>@PU composites by impregnating PVA/ H<sub>2</sub>SO<sub>4</sub> gel electrolyte of different concentrations.

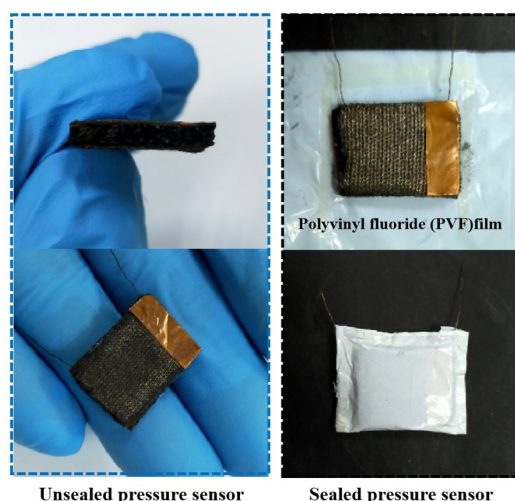

**Fig. S 8** Picture of the unsealed/sealed pressure sensor

**Table S 1.** The conductivity of PVA/H<sub>2</sub>SO<sub>4</sub>@PU

| Concentration of PAV/H <sub>2</sub> SO <sub>4</sub> gel electrolyte (wt %) | Electrical conductivity (S m <sup>-1</sup> ) | Standard deviation        |
|----------------------------------------------------------------------------|----------------------------------------------|---------------------------|
| 0                                                                          | 3.90806×10 <sup>-8</sup>                     | ±9.37625×10 <sup>-9</sup> |
| 10%                                                                        | 5.25278×10 <sup>-4</sup>                     | ±8.99288×10 <sup>-5</sup> |
| 20%                                                                        | 0.00126                                      | ±1.80961×10 <sup>-4</sup> |
| 30%                                                                        | 0.00233                                      | ±3.96245×10 <sup>-4</sup> |
| 40%                                                                        | 0.00431                                      | ±6.07416×10 <sup>-4</sup> |
| 60%                                                                        | 0.2282                                       | ±0.03606                  |
| 80%                                                                        | 0.6708                                       | ±0.1777                   |
| 100%                                                                       | 1.0092                                       | ±0.34641                  |

**Table S2.** Prices of conductive materials for piezoresistive pressure sensors based on conductive PU sponge

| Material                                            | Specifications    | Price (RMB,yuan) | Ref              |
|-----------------------------------------------------|-------------------|------------------|------------------|
| <b>PVA/H<sub>2</sub>SO<sub>4</sub></b>              | <b>500g+500mL</b> | <b>28+23</b>     | <b>This work</b> |
| rGO                                                 | 500mg             | 800              | 38               |
| CNT                                                 | 5 g               | 250              | 18               |
| MWNT-rGO                                            | —                 | 250-1050         | 39               |
| CB                                                  | 100 g             | 300              | 40,41            |
| Au                                                  | 10 mL             | 6000             | 34               |
| PPY                                                 | 500mL             | 54               | 21               |
| Ti <sub>3</sub> C <sub>2</sub> T <sub>x</sub> MXene | (5mg/mL) 20ml,    | 100              | 15               |
